# Supplementary material for: YAP1 activation by human papillomavirus E7 promotes basal cell identity in squamous epithelia
Source: eLife. 2022 Feb 16;11:e75466. doi: 10.7554/eLife.75466 (PMC8959598; doi:10.7554/eLife.75466)
Supplement: Figure 4—source data 1. — Original uncropped images from YAP1, TAZ, V5, and actin Western blots presented in Figure 4B are included as individual image files and as a compiled summary document. [file elife-75466-fig4-data1.zip]

Archive with 5 entries (5 files):
- Figure 4B/Figure 4B Actin.jpg
- Figure 4B/Figure 4B TAZ.jpg
- Figure 4B/Figure 4B V5.jpg
- Figure 4B/FIgure 4B YAP1.jpg
- Figure 4B/Figure 4B.pdf
