# Supplementary material for: YAP1 activation by human papillomavirus E7 promotes basal cell identity in squamous epithelia
Source: eLife. 2022 Feb 16;11:e75466. doi: 10.7554/eLife.75466 (PMC8959598; doi:10.7554/eLife.75466)
Supplement: Figure 7—figure supplement 1—source data 1. — Original uncropped images from PTPN14 and actin Western blots presented in Figure 7—figure supplement 1D are included as individual image files and as a compiled summary document. [file elife-75466-fig7-figsupp1-data1.zip]

Archive with 3 entries (3 files):
- Figure 7--FS1D/Figure 7--FS1D Actin.jpg
- Figure 7--FS1D/Figure 7--FS1D PTPN14.jpg
- Figure 7--FS1D/Figure 7--FS1D.pdf
