# Supplementary material for: YAP1 activation by human papillomavirus E7 promotes basal cell identity in squamous epithelia
Source: eLife. 2022 Feb 16;11:e75466. doi: 10.7554/eLife.75466 (PMC8959598; doi:10.7554/eLife.75466)
Supplement: Figure 7—figure supplement 1—source data 2. — Original uncropped images from PTPN14, RB1, and actin Western blots presented in Figure 7—figure supplement 1F are included as individual image files and as a compiled summary document. [file elife-75466-fig7-figsupp1-data2.zip]

Archive with 4 entries (4 files):
- Figure 7--FS1F/Figure 7--FS1F Actin.jpg
- Figure 7--FS1F/FIgure 7--FS1F PTPN14.jpg
- Figure 7--FS1F/Figure 7--FS1F RB1.jpg
- Figure 7--FS1F/Figure 7--FS1F.pdf
