# Supplementary material for: YAP1 activation by human papillomavirus E7 promotes basal cell identity in squamous epithelia
Source: eLife. 2022 Feb 16;11:e75466. doi: 10.7554/eLife.75466 (PMC8959598; doi:10.7554/eLife.75466)
Supplement: Supplementary file 1. — Sheet one includes a list of all plasmids used in this study including details on the encoded genes, sgRNAs, promoters, antibiotic resistance markers, epitope tags, tag locations, selectable markers as well as Addgene plasmid numbers and citations of the original sources. Sheet two includes a list of all antibodies used in this study including details on the company, product number, and experimental conditions in which they were used. [file elife-75466-supp1.xlsx]

## Sheet: Plasmids
Supplemental File 1
Plasmids used in the study
White lab plasmid #	Plasmid name	Gene	Promoter	Bacterial Resistance	Tag	Tag location	Selectable Marker	Addgene Number	Original Source
8130	MSCV GFP Puro C-FlagHA	GFP	MSCV LTR	Ampicillin	Flag, HA	C terminus	Puromycin	n/a	This Study
6640	MSCV-P C-FlagHA 16E7	HPV16 E7	MSCV LTR	Ampicillin	Flag, HA	C terminus	Puromycin	35018	White et al. (2012) PNAS: 109(5):E260–E267
6641	MSCV-P C-FlagHA 18E7	HPV18 E7	MSCV LTR	Ampicillin	Flag, HA	C terminus	Puromycin	35019	White et al. (2012) PNAS: 109(5):E260–E267
8193	MSCV-P C-FlagHA 18E7 R84S	HPV18 E7	MSCV LTR	Ampicillin	Flag, HA	C terminus	Puromycin	163307	Hatterschide et al. (2020) J. Virol. 94:e1024-20
6659	MSCV-IP N-FlagHA 16E6	HPV16 E6	MSCV LTR	Ampicillin	Flag, HA	N terminus	Puromycin	44152	White et al. (2012) J Virol. 86(24):13174-86
8208	MSCV-Neo C-HA Empty	Empty	MSCV LTR	Ampicillin	HA	C terminus	Neomycin	163310	Hatterschide et al. (2020) J. Virol. 94:e1024-20
8133	MSCV GFP Neo C-HA	GFP	MSCV LTR	Ampicillin	HA	C terminus	Neomycin	n/a	This Study
6993	MSCV-Neo C-HA 18E7	HPV18 E7	MSCV LTR	Ampicillin	HA	C terminus	Neomycin	163311	Hatterschide et al. (2020) J. Virol. 94:e1024-20
8220	MSCV-Neo C-HA 18E7 R84S	HPV18 E7	MSCV LTR	Ampicillin	HA	C terminus	Neomycin	163312	Hatterschide et al. (2020) J. Virol. 94:e1024-20
8291	MSCV-Neo C-HA 18E7 ΔDLLC	HPV18 E7	MSCV LTR	Ampicillin	HA	C terminus	Neomycin	n/a	This Study
8340	pLenti CMV GFP Hygro (656-4)	GFP	CMV	Ampicillin	n/a	n/a	Hygromycin	17446	Campeau et al. (2009) PLoS One. 4(8):e6529
6571	PHAGE-P-CMVt N-HA GFP	GFP	CMV	Ampicillin	HA	N terminus	Puromycin	n/a	Galligan et al. (2015) J Proteome Res. 14(2): 953–966.
7522	pHAGE-P N-V5 PTPN14	PTPN14	CMV	Ampicillin	V5	N terminus	Puromycin	n/a	White et al. (2016) mBio. 7(5):e01530-16
8251	pQCXIH-Myc-YAP	YAP1 isoform 3	CMV	Ampicillin	Myc	C terminus	Hygromycin	33091	Zhao et al. (2007) Genes Dev. 21(21):2747-61
8252	pQCXIH-FLAG-YAP S127A	YAP1 isoform 3	CMV	Ampicillin	Flag	C terminus	Hygromycin	33092	Zhao et al. (2007) Genes Dev. 21(21):2747-61
8254	pQCXIH-Myc-YAP S94A	YAP1 isoform 3	CMV	Ampicillin	Myc	C terminus	Hygromycin	33094	Zhao et al. (2007) Genes Dev. 21(21):2747-61
8319	pDONR ATG-YAP1 WT-Stop	YAP1 isoform 3	n/a	Spectinomycin	n/a	n/a	n/a	n/a	This Study
8321	pDONR ATG-YAP1 S127A-Stop	YAP1 isoform 3	n/a	Spectinomycin	n/a	n/a	n/a	n/a	This Study
8322	pDONR ATG-YAP1 S94A-Stop	YAP1 isoform 3	n/a	Spectinomycin	n/a	n/a	n/a	n/a	This Study
8325	pLIX YAP1 WT	YAP1 isoform 3	TRE promoter, Tet ON	Ampicillin	n/a	n/a	Puromycin	n/a	This Study
8327	pLIX YAP1 S127A	YAP1 isoform 3	TRE promoter, Tet ON	Ampicillin	n/a	n/a	Puromycin	n/a	This Study
8328	pLIX YAP1 S94A	YAP1 isoform 3	TRE promoter, Tet ON	Ampicillin	n/a	n/a	Puromycin	n/a	This Study
8278	pInducer20 EGFP-TEADi	EGFP-TEADi	TRE promoter, Tet ON	Ampicillin	GFP	C terminus	Neomycin	140145	Yuan et al. (2020) Nat Commun. 11, 1472
White lab plasmid #	Plasmid name	HPV genome	Bacterial Resistance	Selectable Marker	Original source
8216	pNeo-loxP-HPV18	HPV18	Kanamycin	Neomycin	Wang et al. (2009) Genes Dev. 23:181-94.
White lab plasmid #	Plasmid name	sgRNA sequence from Broad Brunello library	Promoter	Bacterial Resistance	Selectable Marker	Addgene Number	Original Source
8092	LentiCRISPR v2 sgNT-1	AGCTCGCCATGTCGGTTCTC	U6	Ampicillin	Puromycin	163315	Hatterschide et al. (2020) J. Virol. 94:e1024-20
8115	LentiCRISPR v2 sgPTPN14-3	CCACACTGGACGTGAACGGG	U6	Ampicillin	Puromycin	163314	Hatterschide et al. (2019) PNAS: 116:7033–7042
8116	LentiCRISPR v2 sgPTPN14-4	TGTGCTTACCGTGTGAAAGA	U6	Ampicillin	Puromycin	163316	Hatterschide et al. (2020) J. Virol. 94:e1024-20

## Sheet: Antibodies
Supplemental File 1
Antibodies used in the study
Target	Antiboty Name	Company	Product Number	Use	Dilution	Notes
Actin	Anti-Actin Antibody, clone C4	Sigma-Aldrich	MAB1501	Western Blot	1:20000
GFP	GFP Polyclonal Antibody	Invitrogen	A6455	IHC-P	1:2000	HIER: 10 mM Sodium Citrate pH 6
GFP	GFP Polyclonal Antibody	Invitrogen	A6455	Western Blot	1:1000
Goat anti-Mouse IgG 488	Goat anti-Mouse IgG (H+L) Alexa Fluor 488	Invitrogen	A11001	IHC-P	1:250
Goat anti-mouse IgG HRP	Anti-mouse IgG, HRP-linked Antibody	Cell Signaling Technology	7076	Western Blot	1:2000
Goat anti-Rabbit IgG 594	Goat anti-Rabbit IgG (H+L) Alexa Fluor 594	Invitrogen	A11012	IHC-P	1:250
Goat anti-Rabbit IgG HRP	Anti-Rabbit IgG, HRP-linked Antibody	Cell Signaling Technology	7074	Western Blot	1:2000
HA	Anti-HA-Peroxidase	Roche	12013819001	Western Blot	1:500
ITGB4	Anti-ITGB4 antibody	Sigma-Aldrich	HPA036348	IHC-P	1:100	HIER: Tris-EDTA pH 10
IVL	Anti-involucrin Antibody (A-5)	Santa Cruz Biotechnology	sc-398952	IHC-P	1:100	HIER: either 10 mM Sodium Citrate pH 6 or Tris-EDTA pH 10
KRT1	Cytokeratin 1 (human) monoclonal antibody (34βB4)	Enzo Life Sciences	C34904	IHC-P (TMA)	-
PCNA	Anti-PCNA Antibody (PC10)	Santa Cruz Biotechnology	sc-56	IHC-P	1:100	HIER: Tris-EDTA pH 10
PTPN14	PTPN14 (D5T6Y)	Cell Signaling Technology	13808	Western Blot	1:500
TAZ	TAZ (D3I6D)	Cell Signaling Technology	70148	Western Blot	1:1000
V5	Anti-V5 Tag Antibody	Invitrogen	46-0705	Western Blot	1:1000
YAP1	YAP (D8H1X) XP	Cell Signaling Technology	14074	IHC-P	1:50	HIER: Tris-EDTA pH 10
YAP1	YAP (D8H1X) XP	Cell Signaling Technology	14074	Western Blot	1:1000
