# Supplementary material for: YAP1 activation by human papillomavirus E7 promotes basal cell identity in squamous epithelia
Source: eLife. 2022 Feb 16;11:e75466. doi: 10.7554/eLife.75466 (PMC8959598; doi:10.7554/eLife.75466)
Supplement: Supplementary file 2. — Lists all organotypic cultures analyzed in this study and includes details on the expresion vectors employed, the cell backgrounds used, and all figures and panels that portray each culture. [file elife-75466-supp2.xlsx]

## Sheet: Organotypic Raft Cultures
Supplemental File 2
Organotypic cultures used in the study
Homogenous HFK Organotypic Cultures
Raft Condition	White Lab ID	Vector	HFK Donor	List of Figures *inclusion of a single culture in >1 figure indicates that separate sections of the culture were processed independently
HFK-1	0807201032 HFK	None	4659	Figure 2B	Figure 1-figure supplement 3C	Figure 2-figure supplement 2A
HFK-2	0609211130 HFK 1	None	4659	Figure 1E	Figure 1-figure supplement 2A	Figure 1-figure supplement 2B	Figure 1-figure supplement 3A
HFK-3	0609211130 HFK 2	None	4659	Figure 1B	Figure 1C	Figure 1D	Figure 3C	Figure 1-figure supplement 3B	Figure 1-figure supplement 4A
HPV18 LoxP-1	012720201431 WT 1	pNeo-loxP-HPV18	4659	Figure 1B	Figure 1C	Figure 1-figure supplement 2B
HPV18 LoxP-2	012720201431 WT 2	pNeo-loxP-HPV18	4659	Figure 1-figure supplement 2A
HPV16 E7 WT-1	040520211003 16E7-1	MSCV-P C-FlagHA 16E7	4659	Figure 1-figure supplement 2A	Figure 1-figure supplement 3B
HPV16 E7 WT-2	040520211003 16E7-2	MSCV-P C-FlagHA 16E7	4659	Figure 1D	Figure 1E
HPV18 E7 WT-1	072220201051 18E7 WT1	MSCV-P C-FlagHA 18E7	4659	Figure 1D	Figure 1-figure supplement 3A	Figure 1-figure supplement 4A
HPV18 E7 WT-2	072220201051 18E7 WT2	MSCV-P C-FlagHA 18E7	4659	Figure 1-figure supplement 3C	Figure 2-figure supplement 2A
HPV18 E7 WT-3	080720201032 18E7 WT1	MSCV-P C-FlagHA 18E7	4659	Figure 2B
HPV18 E7 WT-4	080720201032 18E7 WT2	MSCV-P C-FlagHA 18E7	4659
HPV18 E7 WT-5	080720201032 18E7 WT3	MSCV-P C-FlagHA 18E7	4659	Figure 2-figure supplement 2A
HPV18 E7 R84S-1	072220201051 18E7 R84S1	MSCV-P C-FlagHA 18E7 R84S	4659
HPV18 E7 R84S-2	072220201051 18E7 R84S2	MSCV-P C-FlagHA 18E7 R84S	4659	Figure 2-figure supplement 2A
HPV18 E7 R84S-3	080720201032 18E7 R84S1	MSCV-P C-FlagHA 18E7 R84S	4659	Figure 2B
HPV18 E7 R84S-4	080720201032 18E7 R84S2	MSCV-P C-FlagHA 18E7 R84S	4659	Figure 2-figure supplement 2A
HPV16 E6-1	040520211003 16E6-2	MSCV-IP N-FlagHA 16E6	4659	Figure 1E
HPV16 E6-2	040520211003 16E6-3	MSCV-IP N-FlagHA 16E6	4659	Figure 1-figure supplement 4A
Homogenous N/Tert-Cas9 Organotypic Cultures
Raft Condition	White Lab ID	sgRNA	Cell Line	List of Figures *inclusion of a single culture in >1 figure indicates that separate sections of the culture were processed independently
N/Tert-Cas9 Mock-1	072220201051 Mock1 N-Tert	None	N/Tert-Cas9	Figure 2A	Figure 2-figure supplement 1B
N/Tert-Cas9 Mock-2	072220201051 Mock2 N-Tert	None	N/Tert-Cas9	Figure 2-figure supplement 1A	Figure 2-figure supplement 1C
N/Tert-Cas9 sgPTPN14-1	072220201051 sgPTPN141 N-Tert	sgPTPN14-1	N/Tert-Cas9	Figure 2-figure supplement 1A
N/Tert-Cas9 sgPTPN14-2	072220201051 sgPTPN142 N-Tert	sgPTPN14-1	N/Tert-Cas9	Figure 2-figure supplement 1B
N/Tert-Cas9 sgPTPN14-3	072220201051 sgPTPN143 N-Tert	sgPTPN14-1	N/Tert-Cas9	Figure 2B	Figure 2-figure supplement 1C
Cell Fate Organotypic Cultures
Tracer Cell Condition	White Lab ID	Vectors in Tracer Cells	HFK Donor	Dilution (Tracer:Unmodified)	List of Figures
pLIX YAP1 WT (-)-1	082020211055 WT(-)1	pLIX YAP1 WT; pLenti CMV GFP Hygro (656-4)	4948	01:25:00	Figure 7A
pLIX YAP1 WT (-)-2	082020211055 WT(-)2	pLIX YAP1 WT; pLenti CMV GFP Hygro (656-4)	4948	01:25:00
pLIX YAP1 WT (Dox)-1	082020211055 WT DOX 1	pLIX YAP1 WT; pLenti CMV GFP Hygro (656-4)	4948	01:25:00	Figure 7A
pLIX YAP1 WT (Dox)-2	082020211055 WT DOX 2	pLIX YAP1 WT; pLenti CMV GFP Hygro (656-4)	4948	01:25:00
pLIX YAP1 S127A (-)-1	043020211353 CF S127A - 2	pLIX YAP1 S127A; pLenti CMV GFP Hygro (656-4)	4659	01:25:00
pLIX YAP1 S127A (-)-2	082020211055 S127A(-)1	pLIX YAP1 S127A; pLenti CMV GFP Hygro (656-4)	4948	01:25:00
pLIX YAP1 S127A (Dox)-1	043020211353 CF S127A DOX 1	pLIX YAP1 S127A; pLenti CMV GFP Hygro (656-4)	4659	01:25:00
pLIX YAP1 S127A (Dox)-2	043020211353 CF S127A DOX 2	pLIX YAP1 S127A; pLenti CMV GFP Hygro (656-4)	4659	01:25:00
pLIX YAP1 S127A (Dox)-3	082020211055 S127A DOX 1	pLIX YAP1 S127A; pLenti CMV GFP Hygro (656-4)	4948	01:25:00
pLIX YAP1 S127A (Dox)-4	082020211055 S127A DOX 2	pLIX YAP1 S127A; pLenti CMV GFP Hygro (656-4)	4948	01:25:00	Figure 7A
pLIX YAP1 S94A (-)-1	082020211055 S94A(-)1	pLIX YAP1 S94A; pLenti CMV GFP Hygro (656-4)	4948	01:25:00
pLIX YAP1 S94A (Dox)-1	082020211055 S94A DOX 1	pLIX YAP1 S94A; pLenti CMV GFP Hygro (656-4)	4948	01:25:00	Figure 7A
pLIX YAP1 S94A (Dox)-2	082020211055 S94A DOX 2	pLIX YAP1 S94A; pLenti CMV GFP Hygro (656-4)	4948	01:25:00
LentiCRISPR sgNT-1-1	043020211353 CF sgNT-1 2	LentiCRISPR v2 sgNT-1; pLenti CMV GFP Hygro (656-4)	4659	01:25:00
LentiCRISPR sgNT-1-2	100620211327 sgNT-1-1	LentiCRISPR v2 sgNT-1; MSCV GFP Neo C-HA	4952	01:25:00
LentiCRISPR sgNT-1-3	100620211327 sgNT-1-2	LentiCRISPR v2 sgNT-1; MSCV GFP Neo C-HA	4952	01:25:00
LentiCRISPR sgPTPN14-3-1	043020211353 CF sgPTPN14-3 1	LentiCRISPR v2 sgPTPN14-3; pLenti CMV GFP Hygro (656-4)	4659	01:25:00
LentiCRISPR sgPTPN14-3-2	043020211353 CF sgPTPN14-3 2	LentiCRISPR v2 sgPTPN14-3; pLenti CMV GFP Hygro (656-4)	4659	01:25:00
LentiCRISPR sgPTPN14-3-3	100620211327 sgPTPN14-3-1	LentiCRISPR v2 sgPTPN14-3; MSCV GFP Neo C-HA	4952	01:25:00
LentiCRISPR sgPTPN14-3-4	100620211327 sgPTPN14-3-2	LentiCRISPR v2 sgPTPN14-3; MSCV GFP Neo C-HA	4952	01:25:00
LentiCRISPR sgPTPN14-4-1	043020211353 CF sgPTPN14-4 1	LentiCRISPR v2 sgPTPN14-4; pLenti CMV GFP Hygro (656-4)	4659	01:25:00
LentiCRISPR sgPTPN14-4-2	043020211353 CF sgPTPN14-4 2	LentiCRISPR v2 sgPTPN14-4; pLenti CMV GFP Hygro (656-4)	4659	01:25:00
LentiCRISPR sgPTPN14-4-3	100620211327 sgPTPN14-4-1	LentiCRISPR v2 sgPTPN14-4; MSCV GFP Neo C-HA	4952	01:25:00
LentiCRISPR sgPTPN14-4-4	100620211327 sgPTPN14-4-2	LentiCRISPR v2 sgPTPN14-4; MSCV GFP Neo C-HA	4952	01:25:00
Empty Vector-1	102620201147 Empty	MSCV-Neo C-HA Empty; PHAGE-P-CMVt N-HA GFP	4659	01:50:00
Empty Vector-2	90220211137 48 EV 1	MSCV-Neo C-HA Empty; PHAGE-P-CMVt N-HA GFP	4948	01:50:00	Figure 7-figure supplement 2A
Empty Vector-3	90220211137 48 EV 2	MSCV-Neo C-HA Empty; PHAGE-P-CMVt N-HA GFP	4948	01:50:00	Figure 7C
Empty Vector-4	90220211137 52 EV 1	MSCV-Neo C-HA Empty; PHAGE-P-CMVt N-HA GFP	4952	01:50:00
Empty Vector-5	90220211137 52 EV 2	MSCV-Neo C-HA Empty; PHAGE-P-CMVt N-HA GFP	4952	01:50:00
HPV18 E7 WT-1	102620201147 18E7	MSCV-Neo C-HA 18E7; PHAGE-P-CMVt N-HA GFP	4659	01:50:00
HPV18 E7 WT-2	90220211137 48 WT 1	MSCV-Neo C-HA 18E7; PHAGE-P-CMVt N-HA GFP	4948	01:50:00	Figure 7C
HPV18 E7 WT-3	90220211137 48 WT 2	MSCV-Neo C-HA 18E7; PHAGE-P-CMVt N-HA GFP	4948	01:50:00
HPV18 E7 R84S-1	102620201147 R84S	MSCV-Neo C-HA 18E7 R84S; PHAGE-P-CMVt N-HA GFP	4659	01:50:00
HPV18 E7 R84S-2	90220211137 48 R84S 1	MSCV-Neo C-HA 18E7 R84S; PHAGE-P-CMVt N-HA GFP	4948	01:50:00
HPV18 E7 R84S-3	90220211137 48 R84S 2	MSCV-Neo C-HA 18E7 R84S; PHAGE-P-CMVt N-HA GFP	4948	01:50:00	Figure 7C
HPV18 E7 ΔDLLC-1	90220211137 48 dDLLC 1	MSCV-Neo C-HA 18E7 ΔDLLC; PHAGE-P-CMVt N-HA GFP	4948	01:50:00	Figure 7-figure supplement 2A
HPV18 E7 ΔDLLC-2	90220211137 52 dDLLC 1	MSCV-Neo C-HA 18E7 ΔDLLC; PHAGE-P-CMVt N-HA GFP	4952	01:50:00
