# Supplementary material for: YAP1 activation by human papillomavirus E7 promotes basal cell identity in squamous epithelia
Source: eLife. 2022 Feb 16;11:e75466. doi: 10.7554/eLife.75466 (PMC8959598; doi:10.7554/eLife.75466)
Supplement: Supplementary file 3. — Lists the characteristics of the tumors included in the tumor microarray including the primary tumor site, HPV-positive/negative status, primary tumor T-stage, presence of nodal metastasis, and overall pathological stage. [file elife-75466-supp3.xlsx]

## Sheet: TMA
Supplemental File 3
Tumor microarray specimen information
		Oral Cavity	Oropharynx	Total	HPV-positive	HPV-negative*
# Patients		72	48	120	33	87
Primary tumor (T-stage) †
	Early (T1 or T2)	60	40	100	27	73
	Advanced (T3 or T4)	12	8	20	6	14
Nodal metastasis
	Positive	24	39	63	29	34
	Negative	48	9	57	4	53
Overall pathologic stage †
	Early (I or II)	43	7	50	3	47
	Advanced (III or IV)	29	41	70	30	40
*HPV status was defined by IHC for p16 for oropharyngeal tumors during routine clinical and was inferred as negative for oral cavity tumors per standards of the College of American Pathologists (Lewis et al. (2018) Archives of Pathology & Laboratory Medicine 142:559–597).
† 7th edition AJCC staging manual
