# Supplementary material for: YAP1 activation by human papillomavirus E7 promotes basal cell identity in squamous epithelia
Source: eLife. 2022 Feb 16;11:e75466. doi: 10.7554/eLife.75466 (PMC8959598; doi:10.7554/eLife.75466)
Supplement: Supplementary file 4. — Lists the genes included in each pathway used in the pathway mutational analyses. [file elife-75466-supp4.xlsx]

## Sheet: Sheet1
Supplemental File 4
Gene Lists for Pathway Mutational Analyses
HIPPO Pathway	Cell Cycle	p53
STK4	CDKN1A	TP53
STK3	CDKN1B	MDM2
SAV1	CDKN2A	MDM4
LATS1	CDKN2B	ATM
LATS2	CDKN2C	CHEK2
MOB1A	CCND1	RPS6KA3
MOB1B	CCND2
YAP1	CCND3
WWTR1	CCNE1
TEAD1	CDK2
TEAD2	CDK4
TEAD3	CDK6
TEAD4	RB1
PTPN14	E2F1
NF2	E2F3
WWC1
TAOK1
TAOK2
TAOK3
CRB1
CRB2
CRB3
LLGL1
LLGL2
HMCN1
SCRIB
HIPK2
FAT1
FAT2
FAT3
FAT4
DCHS1
DCHS2
CSNK1E
CSNK1D
AJUBA
LIMD1
WTIP
