# Supplementary figures and images for: YAP1 activation by human papillomavirus E7 promotes basal cell identity in squamous epithelia
Source: eLife journal article supplement (doi:10.7554/elife.75466), 2022-02-16

**Figure 4B**

anti-V5

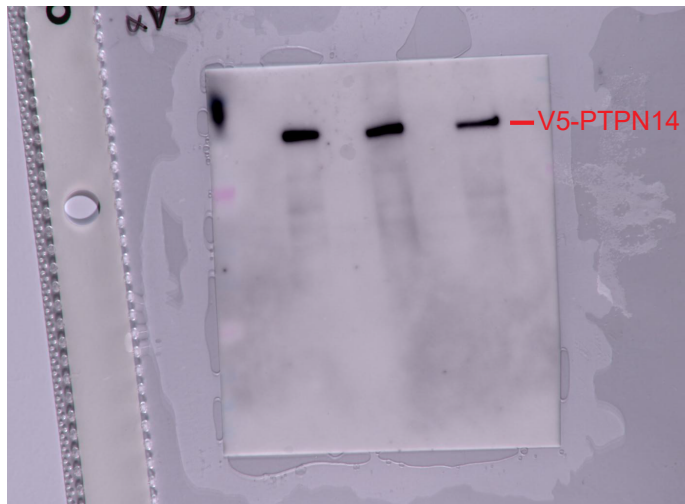

anti-YAP1

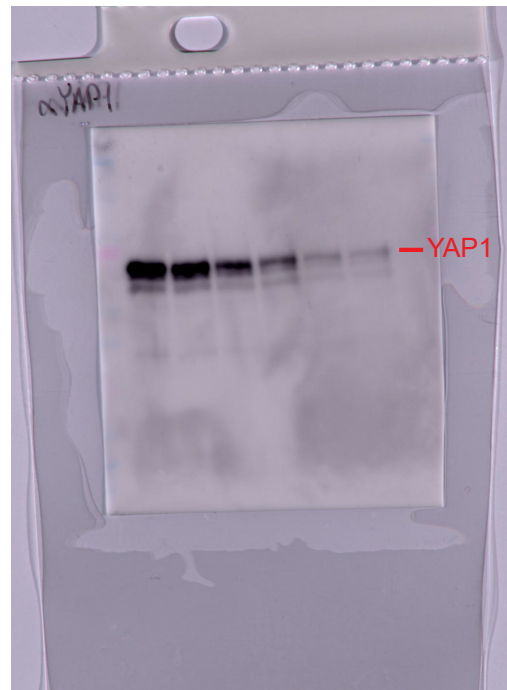

anti-TAZ

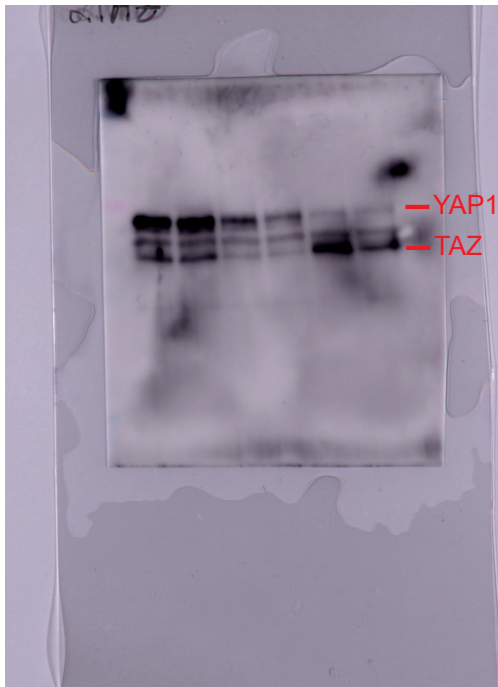

anti-Actin

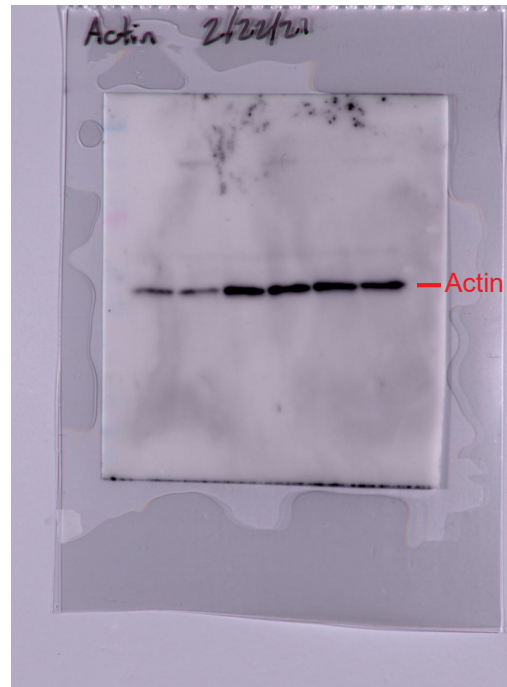

Supplement: fig4-data1 [file Figure 4B.pdf › Figure 4B/Figure 4B.pdf]

# Figure 4-figure supplement 1A

anti-PTPN14

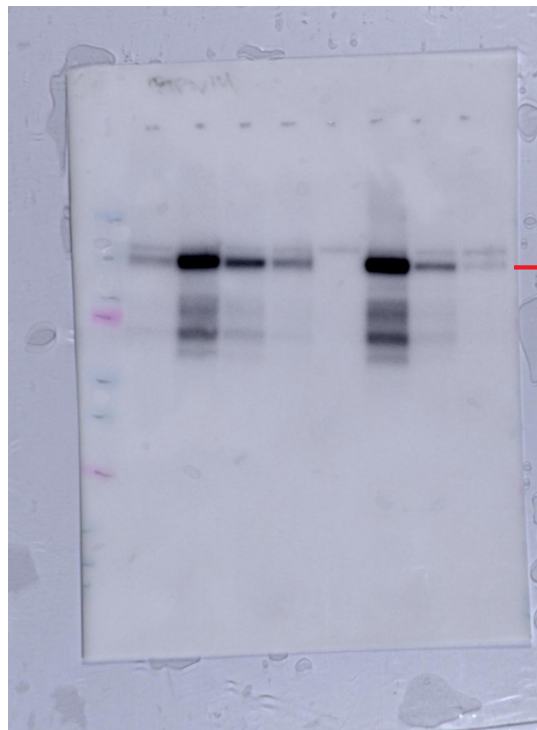

anti-V5

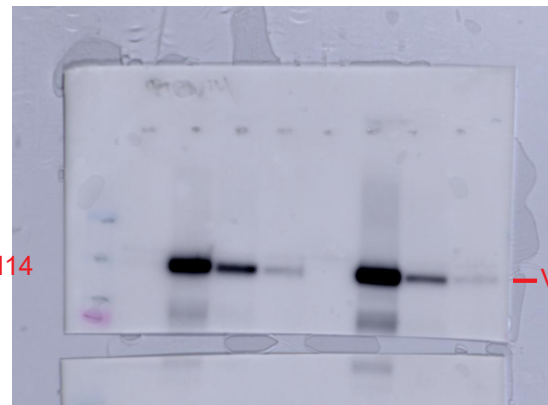

anti-IVL

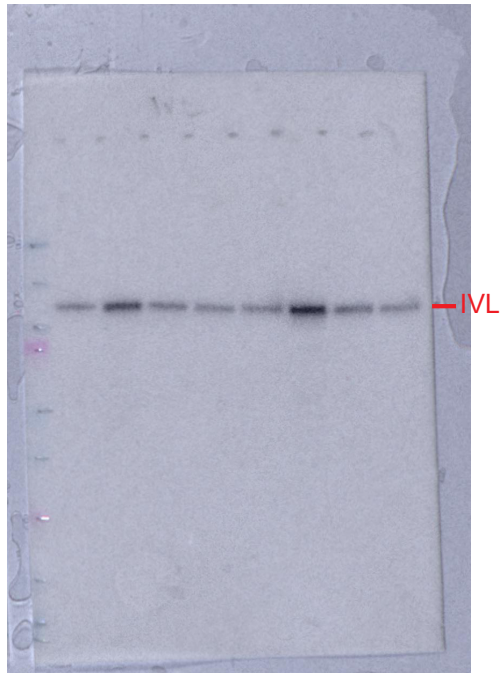

anti-Actin

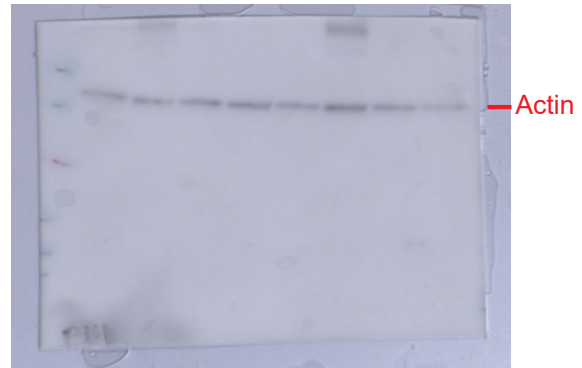

Supplement: fig4-figsupp1-data1 [file Figure 4--FS1A.pdf › Figure 4--FS1A/Figure 4--FS1A.pdf]

## Figure 7-figure supplement 1D

anti-PTPN14

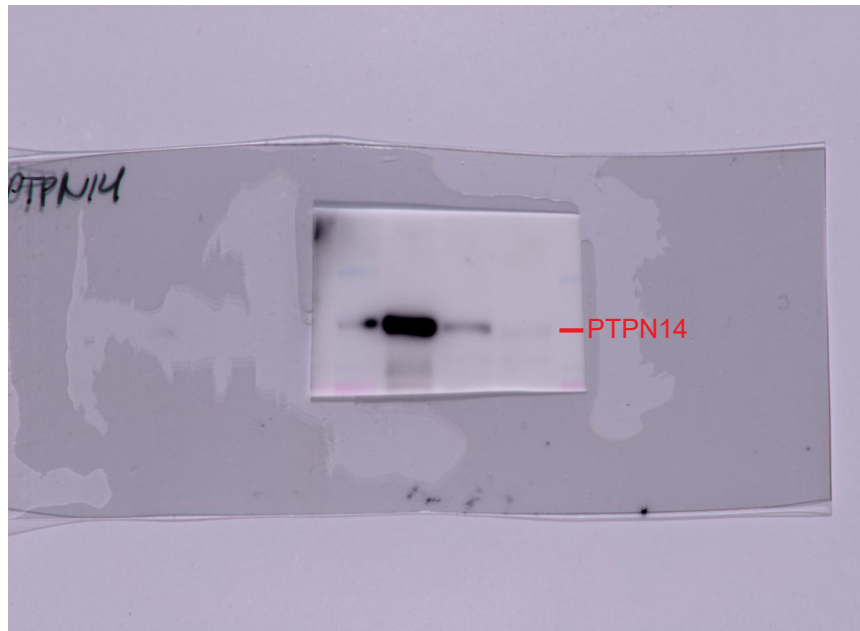

anti-Actin

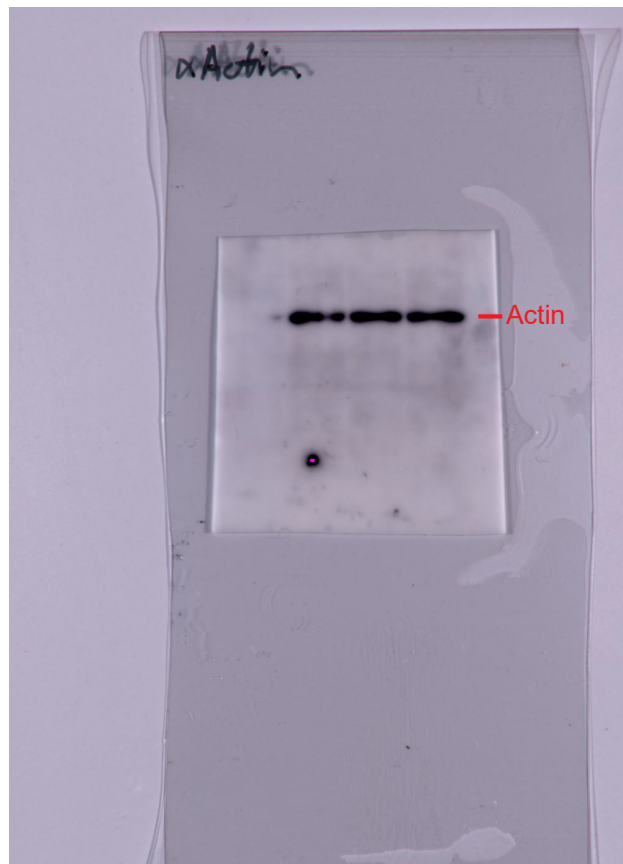

Supplement: fig7-figsupp1-data1 [file Figure 7--FS1D.pdf › Figure 7--FS1D/Figure 7--FS1D.pdf]

**Figure 7-figure supplement 1F**

anti-PTPN14

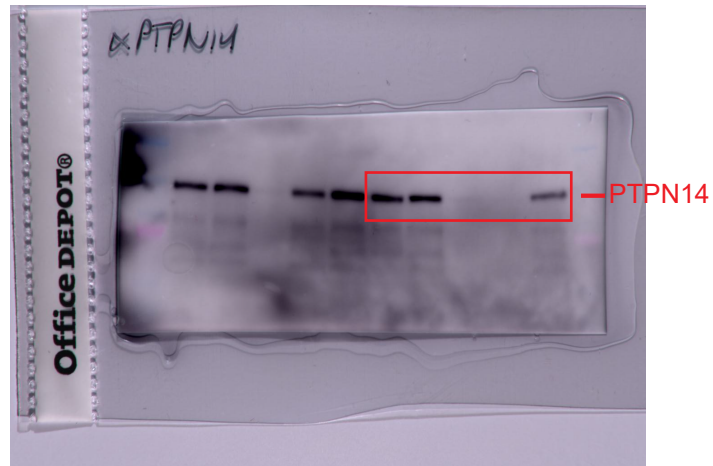

anti-RB1

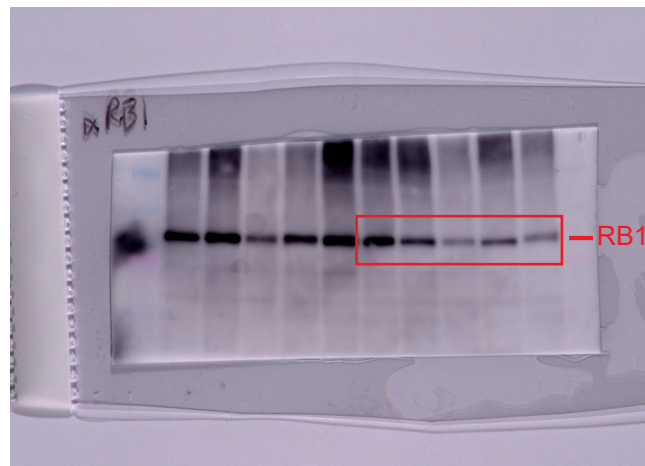

anti-Actin

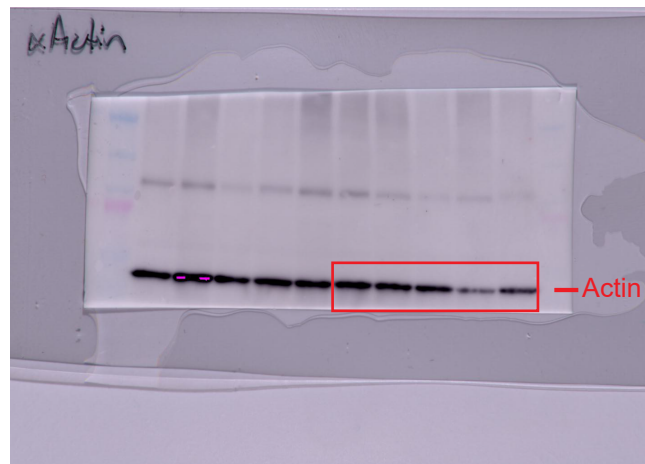

Supplement: fig7-figsupp1-data2 [file Figure 7--FS1F.pdf › Figure 7--FS1F/Figure 7--FS1F.pdf]
